# Supplementary material
Source: PubMed Central journal article supplement (PMC524103)
Supplement: bmj_38236.646678.55_1.pdf [file bmj_38236.646678.55_1.pdf]

## **Questionnaire: The Clinical Use of Placebo**

Please answer the following questions:

1. Age: \_\_\_\_\_
2. Sex:
  - a. Male
  - b. Female
3. Profession:
  - a. Physician
  - b. Nurse
4. Years of work since professional accreditation: \_\_\_\_\_
5. I work in a:
  - a. Inpatient and hospital-based outpatient medical department
  - b. Inpatient and hospital-based outpatient surgical department
  - c. Family physicians clinic in the community
6. The number of patient I see in the course of week is:
  - a. <10
  - b. 10-30
  - c. 30-50
  - d. 50-100
  - e. > 100
7. I prescribe or administer placebos:
  - a. On a daily basis
  - b. Once a week on average
  - c. Once a month on average
  - d. Once a year in average

- e. Not relevant: I never give placebo
8. Before I prescribe or administer placebo I tell the patient that:
- a. It is medication
  - b. It is a placebo
  - c. It is a medicine with no specific effect
  - d. I say nothing
  - e. Not relevant: I never give placebo
9. When I use placebo it is:
- a. Usually effective
  - b. Sometimes effective
  - c. Never effective
  - d. I do not know if it is effective
  - e. Not relevant: I never give placebo
10. In the following situations I have prescribed or administered placebo (you may choose more than one option):
- a. Instead of medication, when using that medicine is not justified
  - b. As a supplement to medication
  - c. Instead of a medication in order to buy time between one dose and the next of the medication
  - d. To calm a patient
  - e. To mollify a complaining patient
  - f. As a diagnostic tool (i.e. in order to distinguish between a genuine and imaginary symptom, or an organic and psychological symptom)
  - g. As a treatment for a nonspecific symptom
  - h. To control pain (including in the context of patient controlled analgesia)
  - i. In other conditions (please elaborate) \_\_\_\_\_

j. Not relevant: I never give placebo

11. Scientific data suggests that some patients benefit from the placebo. In my opinion the mechanism behind this phenomena is (you may choose more than one option):

- a. Biochemical
- b. Psychological
- c. The natural course of the illness
- d. Positive energies
- e. Unexplained factors
- f. I do not know

12. My position concerning the use of placebo is that it is:

- a. Always prohibited
- b. Permitted if research supports its efficiency
- c. Permitted if the experience in the department supports its efficiency
- d. Permitted after notifying the patient that he or she is receiving a placebo
